# Supplementary material
Source: PubMed Central journal article supplement (PMC7609875)

FOXL2

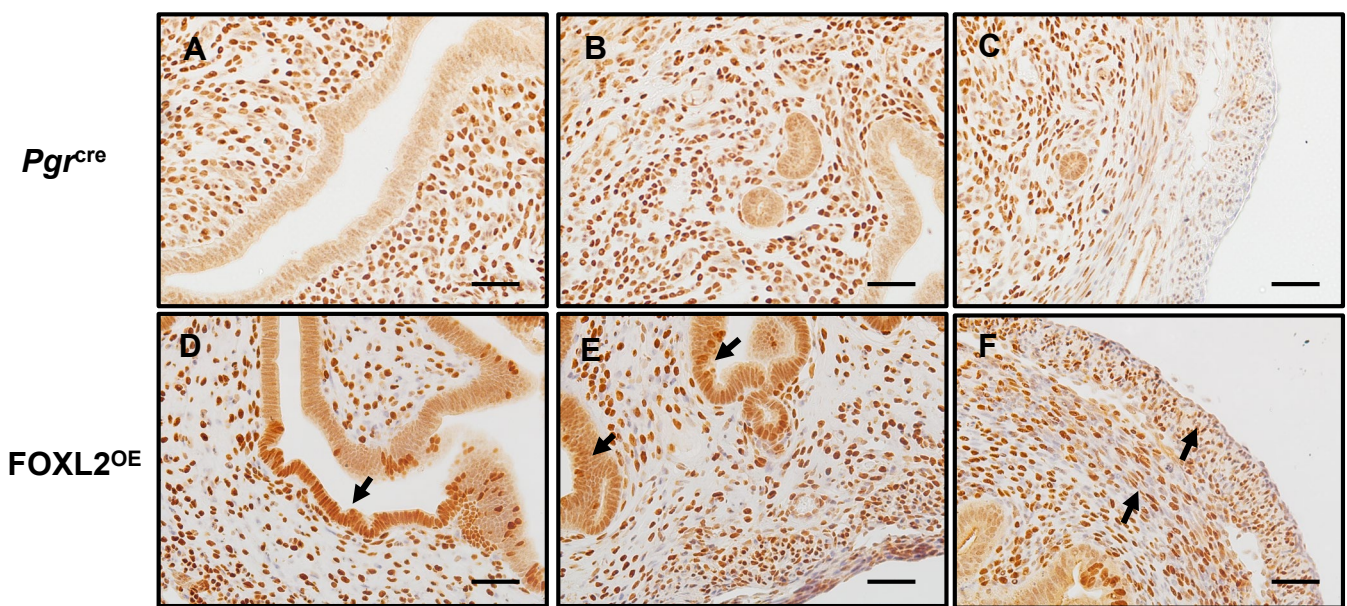

His-tag: red

50µm

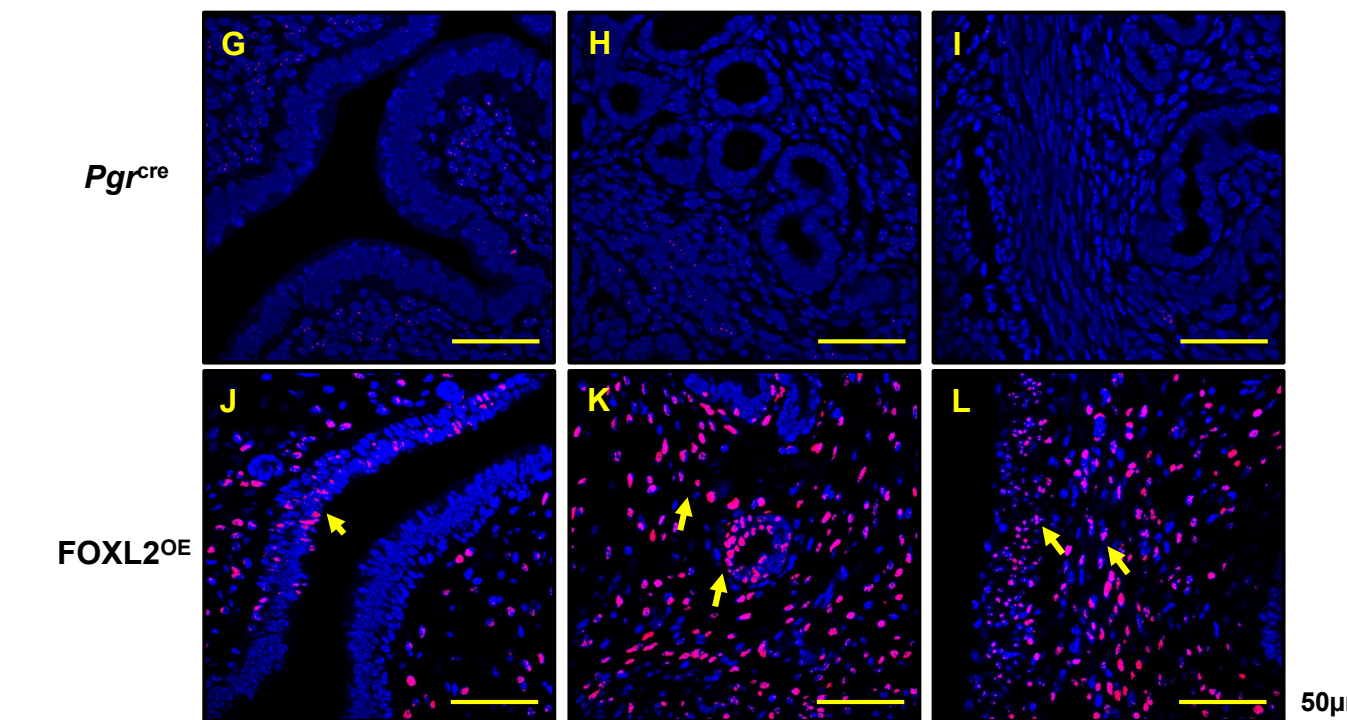

50µm

Suppl. Fig. 2

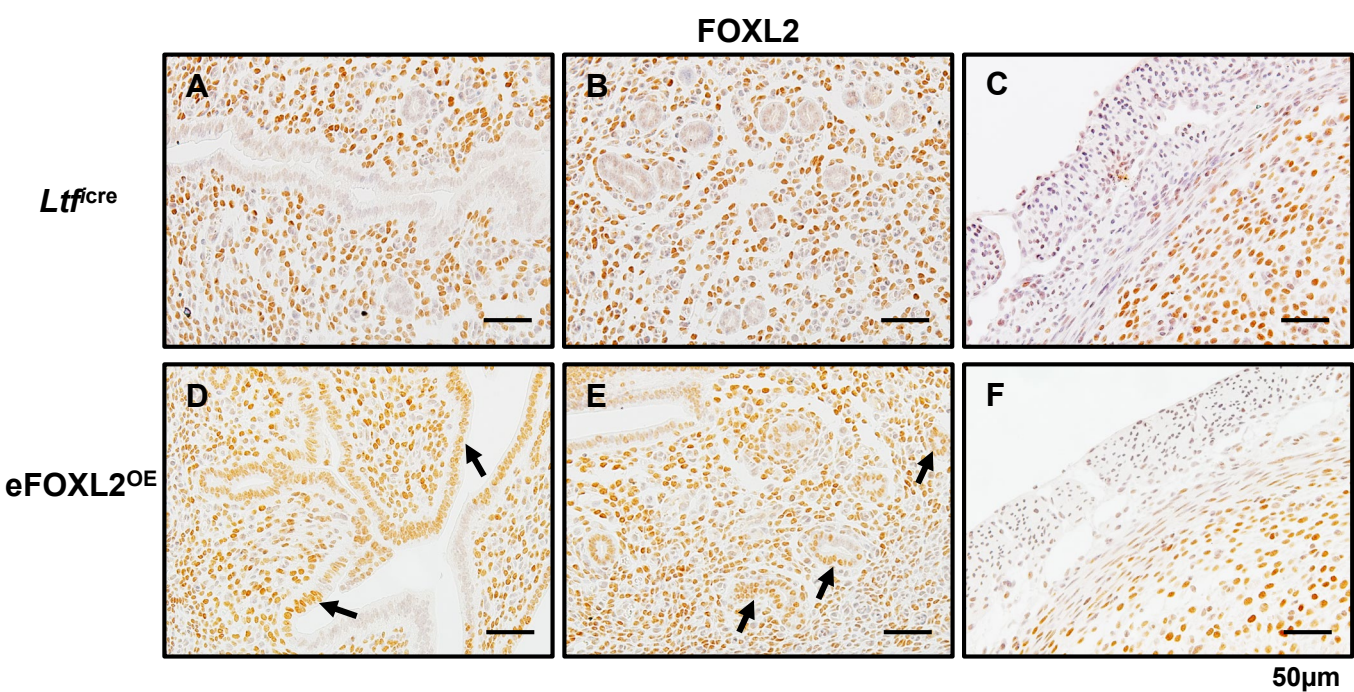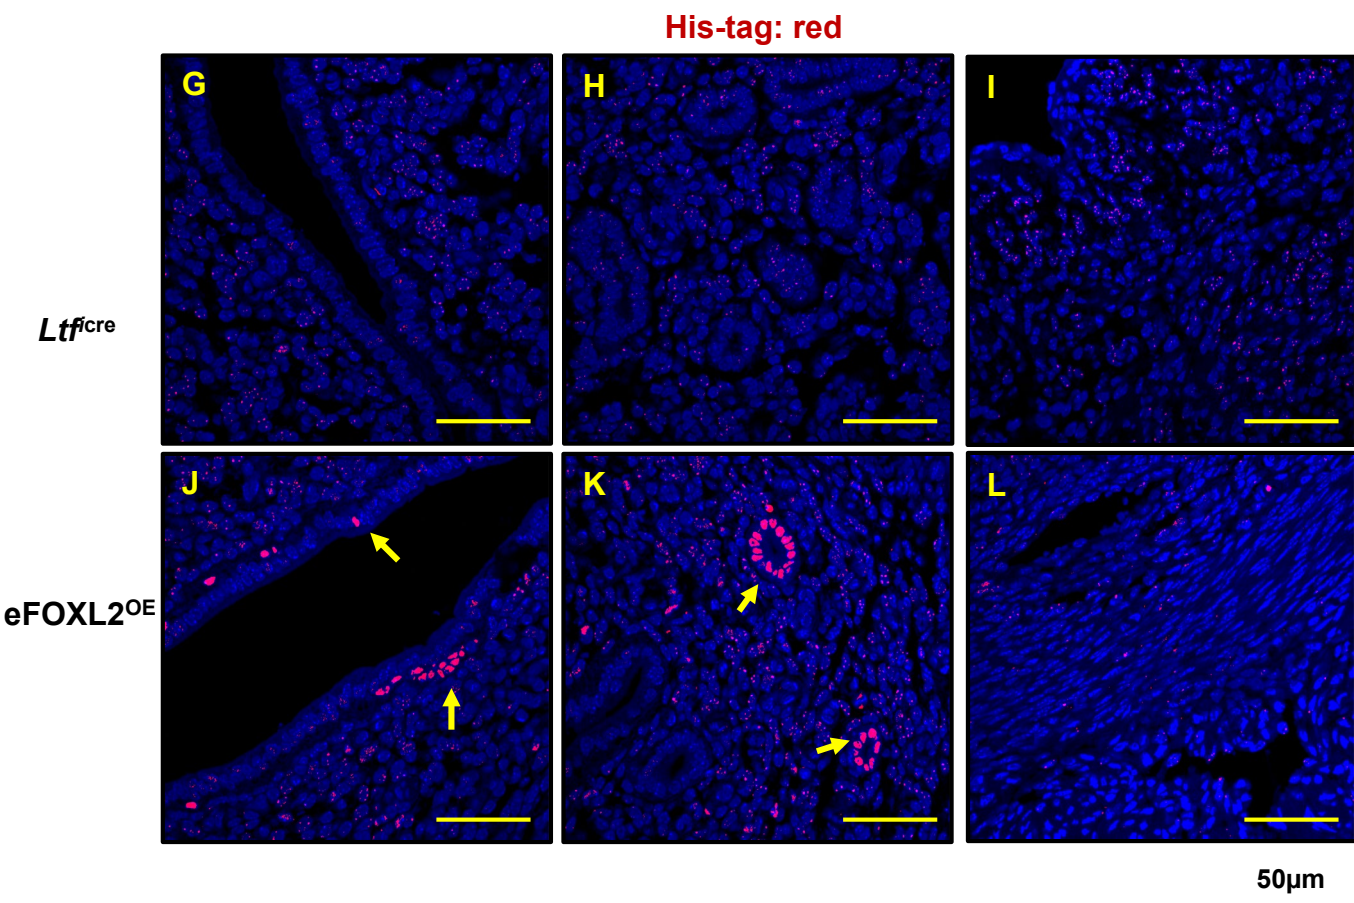

Suppl. Fig. 3

A

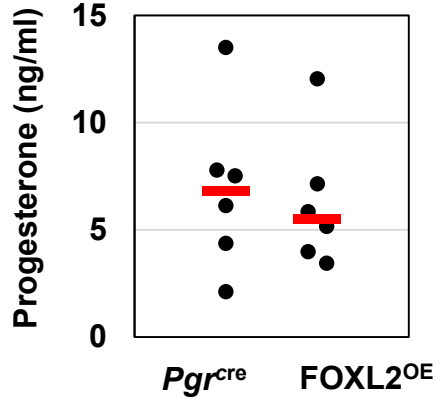

B

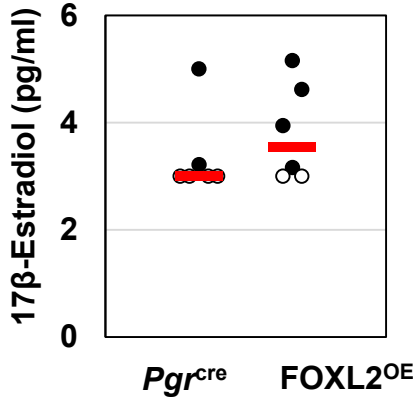

Suppl. Fig. 4

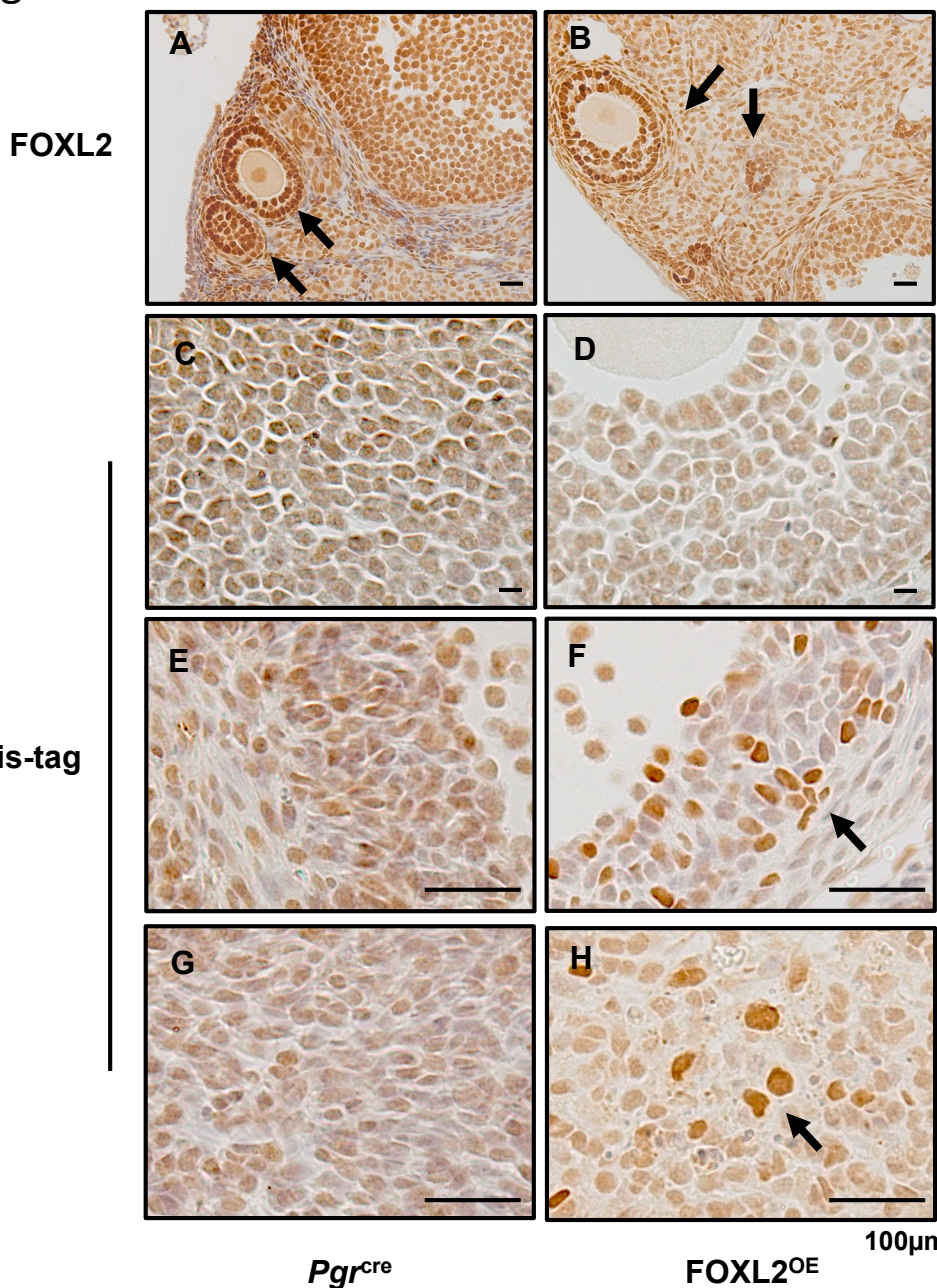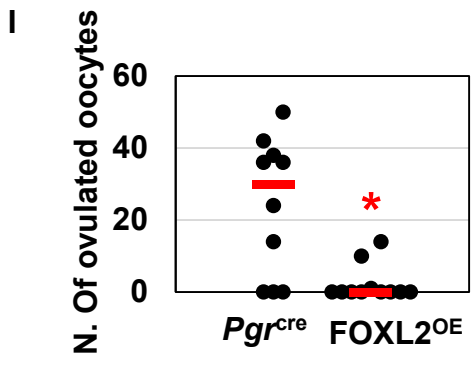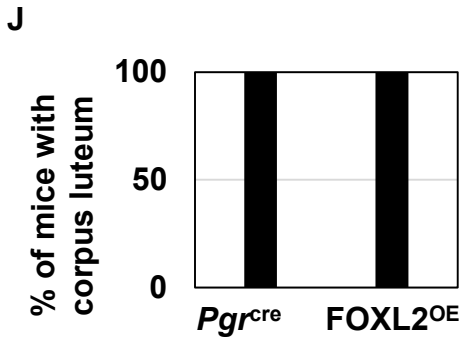

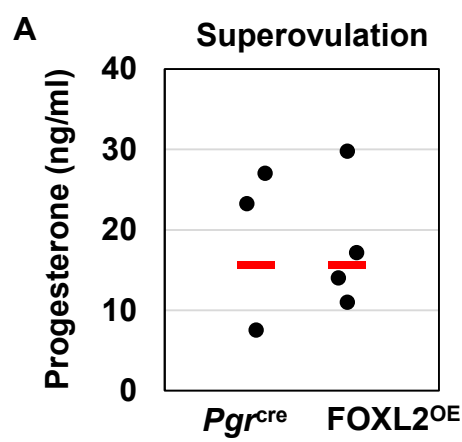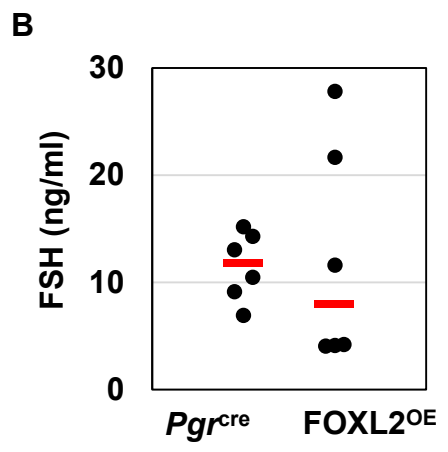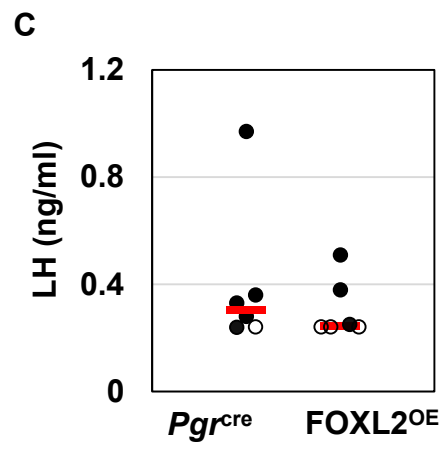

Supplement: prcre_foxl2_figure_final_suppl_ioaa143.pdf [file prcre_foxl2_figure_final_suppl_ioaa143.pdf]
